# Supplementary material
Source: Springer Nature journal article supplement (https://www.springermedizin.de/resource/supplementary/12885_2013_4354_MOESM3_ESM.pdf/9466088)
Supplement: MOESM3 [file 9466088]

| Primer pairs (amplicon length) | Amplification delay (folds) |          |      |
|--------------------------------|-----------------------------|----------|------|
|                                | malten                      | maltonis | CDDP |
| F1→ 121 bp ←R                  | 2.55                        | 12.4     | 113  |
| F2→ 179 bp ←R                  | 4.5                         | 59.5     | 643  |
| F3→ 240 bp ←R                  | 8.4                         | 113      | 637  |
| F4→ 301 bp ←R                  | 23.7                        | 212      | 1228 |
| F5→ 479 bp ←R                  | 206                         | 1945     | 3449 |
| F6→ 622 bp ←R                  | 728                         | 6119     | 4360 |

### Additional file 3

Amplification delay (folds) for each set of primers as depicted in the "Primer Pair" column.
